1 **Long transposon-rich centromeres in an oomycete reveal divergence of**  
2 **centromere features in Stramenopila-Alveolata-Rhizaria lineages**

3  
4  
5

6 Yufeng “Francis” Fang<sup>a</sup>, Marco A. Coelho<sup>a</sup>, Haidong Shu<sup>b</sup>, Klaas Schotanus<sup>a</sup>, Bhagya C.  
7 Thimmappa<sup>c,1</sup>, Vikas Yadav<sup>a</sup>, Han Chen<sup>b</sup>, Ewa P. Malc<sup>d</sup>, Jeremy Wang<sup>d</sup>, Piotr A. Mieczkowski<sup>d</sup>,  
8 Brent Kronmiller<sup>e</sup>, Brett M. Tyler<sup>e</sup>, Kaustuv Sanyal<sup>c</sup>, Suomeng Dong<sup>b</sup>, Minou Nowrousian<sup>f</sup>, and  
9 Joseph Heitman<sup>a,2</sup>

10  
11  
12

13 <sup>a</sup>Department of Molecular Genetics and Microbiology, Duke University Medical Center, Durham,  
14 North Carolina 27710; <sup>b</sup>College of Plant Protection, Nanjing Agricultural University, Nanjing,  
15 China; <sup>c</sup>Molecular Biology and Genetics Unit, Jawaharlal Nehru Centre for Advanced Scientific  
16 Research, Bangalore, India; <sup>d</sup>Department of Genetics, University of North Carolina, Chapel Hill,  
17 North Carolina 27599; <sup>e</sup>Center for Genome Research and Biocomputing and Department of  
18 Botany and Plant Pathology, Oregon State University, Corvallis, Oregon 97331; <sup>f</sup>Lehrstuhl fuer  
19 Molekulare und Zellulaere Botanik, Ruhr-Universitaet Bochum, Bochum, Germany

20  
21  
22

23 <sup>1</sup>Present address: Department of Biochemistry, Robert-Cedergren Centre for Bioinformatics and  
24 Genomics, University of Montreal, 2900 Edouard-Montpetit, Montreal, H3T1J4, QC, Canada.

25 <sup>2</sup>To whom correspondence should be addressed. Email: heitm001@duke.edu.

26 **Abstract**

27 Centromeres are chromosomal regions that serve as platforms for kinetochore assembly  
28 and spindle attachments, ensuring accurate chromosome segregation during cell division.  
29 Despite functional conservation, centromere DNA sequences are diverse and often repetitive,  
30 making them challenging to assemble and identify. Here, we describe centromeres in an  
31 oomycete *Phytophthora sojae* by combining long-read sequencing-based genome assembly and  
32 chromatin immunoprecipitation for the centromeric histone CENP-A followed by high-throughput  
33 sequencing (ChIP-seq). *P. sojae* centromeres cluster at a single focus at different life stages and  
34 during nuclear division. We report an improved genome assembly of the *P. sojae* reference strain,  
35 which enabled identification of 15 enriched CENP-A binding regions as putative centromeres.  
36 By focusing on a subset of these regions, we demonstrate that centromeres in *P. sojae* are  
37 regional, spanning 211 to 356 kb. Most of these regions are transposon-rich, poorly transcribed,  
38 and lack the histone modification H3K4me2 but are embedded within regions with the  
39 heterochromatin marks H3K9me3 and H3K27me3. Strikingly, we discovered a Copia-like  
40 transposon (CoLT) that is highly enriched in the CENP-A chromatin. Similar clustered elements  
41 are also found in oomycete relatives of *P. sojae*, and may be applied as a criterion for prediction  
42 of oomycete centromeres. This work reveals a divergence of centromere features in oomycetes  
43 as compared to other organisms in the Stramenopila-Alveolata-Rhizaria (SAR) supergroup  
44 including diatoms and *Plasmodium falciparum* that have relatively short and simple regional  
45 centromeres. Identification of *P. sojae* centromeres in turn also augments the genome assembly.

46

47 Key words: Stramenopila; genome assembly; CENP-A; Copia-like transposon

48

## 49 **Significance Statement**

50 Oomycetes are fungal-like microorganisms that belong to the stramenopiles within the  
51 Stramenopila-Alveolata-Rhizaria (SAR) supergroup. The *Phytophthora* oomycetes are infamous  
52 as plant killers, threatening crop production worldwide. Because of the highly repetitive nature of  
53 their genomes, assembly of oomycete genomes presents challenges that impede identification of  
54 centromeres, which are chromosomal sites mediating faithful chromosome segregation. We  
55 report long-read sequencing-based genome assembly of the *Phytophthora sojae* reference strain,  
56 which facilitated the discovery of centromeres. *P. sojae* harbors large regional centromeres  
57 enriched for a Copia-like transposon that is also found in discrete clusters in other oomycetes.  
58 This study provides insight into the oomycete genome organization, and broadens our knowledge  
59 of the centromere structure, function and evolution in eukaryotes.

## 60 Introduction

61 Accurate segregation of chromosomes during mitosis and meiosis is critical for the  
62 development and reproduction of all eukaryotic organisms. Centromeres are specialized regions  
63 of chromosomes that mediate kinetochore formation, spindle attachment, and sister chromatid  
64 segregation during cell division (1, 2). The DNA coincident with functional centromeres typically  
65 consists of unusual sequence composition (e.g. AT-rich) and structure (e.g. repeats, transposable  
66 elements), low gene density, and transcription of non-coding RNA (ncRNA) as well as  
67 heterochromatic nature (3). However, an active centromere is defined not by DNA sequences but  
68 by the deposition of a centromere-associated protein called centromere protein A (CENP-A, also  
69 known as CenH3) (1, 4). CENP-A is a histone H3 variant, which replaces the canonical H3 in the  
70 nucleosomes at centromeres and provides the foundation for kinetochore assembly (1, 5, 6).

71 Despite the fact that centromere function is broadly conserved, centromeric sequences  
72 vary greatly in size and composition, ranging from “point” centromeres of 125 bp in length to  
73 “regional” centromeres consisting of up to megabases of repeated sequences to  
74 holocentromeres that extend along the entire length of the chromosome (1, 3). To date, point  
75 centromeres have been only reported in the budding yeast *Saccharomyces cerevisiae* and its  
76 close relatives, holocentromeres have been identified in some insects, plants and nematodes,  
77 represented by *Caenorhabditis elegans*, while regional centromeres are the most common type  
78 and found in nearly all eukaryotic phyla (1, 3). Most animals and plants have large regional  
79 centromeres composed of satellite sequences that are organized into a variety of different higher  
80 order repeats (4, 7, 8). Some plant centromeres also possess a different type of repeat called  
81 centromere-specific retroelements (CR) (9). In comparison, all fungal centromeres identified to  
82 date do not contain satellite repeats and have diverse organizations. The size of fungal regional  
83 centromeres ranges from several kilobases, such as in *Candida albicans*, to hundreds of  
84 kilobases in *Neurospora crassa* (10, 11). The centromeric sequences of fungal regional

85 centromeres can be composed of active or inactive clusters of transposable elements and thus  
86 very repetitive, such as in *Cryptococcus* spp. and *N. crassa* (12, 13), or can be nonrepetitive and  
87 very short, such as in the wheat pathogen *Zymoseptoria tritici* (14) and *C. albicans* (15).  
88 Information on centromeres is limited in other eukaryotic lineages. The malaria pathogen  
89 *Plasmodium falciparum* and the diatom *Phaeodactylum tricornutum* CENP-A binding regions are  
90 characterized by short simple AT-rich sequences (16, 17), while the parasite *Toxoplasma gondii*  
91 has a simple centromere without nucleotide bias (18).

92 Due to their highly repetitive nature, assembly of large regional centromeres presents a  
93 significant challenge. Emerging long-read sequencing technologies, such as Pacific Bioscience  
94 (PacBio) and Oxford Nanopore Technology (ONT), have led to substantial advances in resolution  
95 of chromosomal structures including highly repetitive sequences such as centromeres. Using  
96 these technologies, centromeres that were difficult to resolve using short-read sequencing, were  
97 defined in various organisms, from fungi (12, 19, 20) to insects (21), plants (22) and humans (23).

98 Oomycetes are fungal-like organisms but belong to the stramenopila kingdom within the  
99 Stramenopila-Alveolata-Rhizaria (SAR) supergroup (24, 25). The SAR supergroup contains a  
100 high diversity of lineages that include many important photosynthetic lineages (e.g. diatoms and  
101 kelp), and important parasites of animals (e.g., *Plasmodium*, the causative agent of malaria) and  
102 plants (e.g., oomycetes, or water molds) (26). *Phytophthora* is a large oomycete genus (>160  
103 species found to date) and contains some of the most devastating plant pathogens that destroy  
104 a wide range of plants important in agriculture, forestry, ornamental and recreational plantings,  
105 and natural ecosystems (27). One notorious example is *Phytophthora infestans*, which caused  
106 the great Irish potato famine of the mid-1840s (28). Today, *Phytophthora* species remain  
107 significant threats to major food crops, causing multi-billion US dollars losses annually throughout  
108 the world (27, 29). *Phytophthora sojae* is a widespread soil-borne pathogen of soybean. Because  
109 of its economic impact, and tractable genetic manipulation (30-32), *P. sojae* has become a model  
110 species to study oomycete genetics, biology, and interactions with plants.

111 To date, the genomes of more than 20 *Phytophthora* species have been sequenced (33).  
112 Their genomes are generally large and display complex features: they are diploid, highly  
113 heterozygous for heterothallic species, and very repetitive, which makes genome assembly  
114 challenging. The most contiguous oomycete genome assembly published to date is of the *P. sojae*  
115 reference genome, which was generated based on Sanger random shotgun sequencing and  
116 subsequent improvements involving gap closure and BAC sequencing (25, 34). *P. sojae* genome  
117 assembly v3.0 ([www.jgi.doe.gov](http://www.jgi.doe.gov)) spans ~82 Mb and contains 82 scaffolds; however, there are  
118 ~3 Mb of unresolved gaps (N's) persisting in the assembly. Recently, significant progress has  
119 been made in genome assemblies of oomycetes based on long-read sequencing (35, 36);  
120 however, the identity or the nature of the DNA sequences that form essential chromosomal  
121 elements such as centromeres, remain unknown. In this study, using the evolutionarily conserved  
122 kinetochore protein CENP-A as a tool, we investigated cellular dynamics of the kinetochore  
123 complex in *P. sojae*, and uncovered the nature of the oomycete centromeres with the aid of long-  
124 read genome sequencing and ChIP-seq technologies. Our findings suggest that the centromeres  
125 of *P. sojae* are divergent from those reported in other SAR lineages, and their features may be  
126 used to predict centromeres in other oomycetes.

127

## 128 **Results**

### 129 **GFP-tagging of CENP-A in *P. sojae* reveals clustered centromeres in different life stages** 130 **and throughout hyphal growth**

131 Kinetochore protein homologs have been predicted in diverse eukaryotic lineages  
132 including oomycete species (37). To identify kinetochore proteins in *P. sojae*, we conducted  
133 BLAST searches against the existing *P. sojae* genome database using the predicted oomycete  
134 orthologs as query. Gene models of *P. sojae* kinetochore proteins were examined and corrected

135 based on RNA-seq data when necessary. Protein sequences were verified based on the presence  
136 of corresponding motifs (Fig. S1 and Dataset S1).

137 To examine centromere/kinetochore organization and localization in *P. sojae*, we selected  
138 CENP-A, the hallmark of centromere identity in most organisms. The RNA-seq data did not  
139 support the gene models of *CENP-A* that was instead verified by 3'-RACE and RT-PCR, followed  
140 by Sanger sequencing (Fig. S2 A and B). *P. sojae* CENP-A (PsCENP-A) has a conserved C-  
141 terminus including the "CENP-A targeting domain" (CATD) (Fig. S2C). *GFP* was fused to *CENP-*  
142 *A* at the N-terminus and transiently expressed in *P. sojae* transformants with a constitutive  
143 promoter derived from the *Bremia lactucae* *HAM34* gene (Fig. S2D). Overexpressed GFP-CENP-  
144 A exhibited nuclear localization with a single fluorescent focus in the nucleus (Fig. S2D),  
145 suggesting that *P. sojae* has a clustered centromere organization.

146 We also generated GFP labeled CENP-A expressed from the endogenous locus utilizing  
147 CRISPR/Cas9-mediated gene replacement (Figs. 1A and S3). Homokaryotic GFP-CENP-A  
148 strains exhibited single GFP foci within nuclei from different *P. sojae* life stages (Figs. 1B),  
149 confirming that the clustered centromere organization is a feature in *P. sojae*. In addition, we  
150 tracked the centromere dynamics during hyphal growth. Intriguingly, the clustered centromere  
151 pattern was maintained throughout *P. sojae* nuclear division (Fig. 1C and Movie S1).

152

### 153 **Identification of centromeres in a long-read Nanopore-based assembly**

154 To identify *P. sojae* centromeres, we performed native chromatin immunoprecipitation (N-  
155 CHIP) using an anti-GFP antibody against the GFP-CENP-A fusion, followed by high-throughput  
156 Illumina DNA sequencing. CHIP-seq reads were mapped to the latest Sanger genome assembly  
157 (*P. sojae* V3 from JGI), which identified 12 scaffolds that showed relatively concentrated  
158 enrichment of CENP-A reads (Fig. S4A). CENP-A peaks appeared scattered in Scaffold 1 and

159 Scaffold 11, while more clustered in the other 10 scaffolds. However, further examination of each  
160 CENP-A binding region revealed that most of the regions were interrupted by many sequence  
161 gaps, which hampered analysis of the sequence features of the candidate centromeres. Thus, we  
162 processed to re-sequence and re-assemble the reference *P. sojae* genome.

163 To improve the genome assembly of *P. sojae* reference strain P6497, we applied  
164 Nanopore long-read sequencing and generated a *de novo* genome assembly with SMARTdenovo  
165 together with polishing from PacBio and Sanger reads (Fig. S5A and *Appendix SI Text*). The  
166 resulting assembly of the nuclear genome (Psojae2019.1) has a size of 86 Mb contained in 70  
167 contigs, with a contig N50 of 2 Mb (Fig. S5C). Comparison of Psojae2019.1 to the Sanger  
168 assembly indicated that Psojae2019.1 has more repetitive sequences and most regions were  
169 colinear (Fig. S5 B and C, also see *Appendix SI Text* for details). We also checked telomere  
170 repeats using a motif proposed for oomycetes (38), and found 13 contigs (versus 7 in Sanger)  
171 that harbor telomeric sequences at single ends (*Appendix SI Text* and Dataset S2).

172 ChIP-seq reads derived from PsCENP-A were mapped to the new genome assembly  
173 Psojae2019.1 (Table S2), which initially revealed 16 regions exhibiting CENP-A enrichment. On  
174 closer analysis, we found that the unassembled centromere in contig 20 was an artifact caused  
175 by inaccurate genome assembly, as this region was duplicated with a centromere-containing  
176 region in contig34 (Fig. S6F). Of the 15 remaining CENP-A binding regions, 11 regions were  
177 assembled within contigs, whereas four regions were disrupted at the edge of contigs (Fig. 2).  
178 Long-read coverage analysis verified the integrity of 10 centromeres (Fig. S7), while the CENP-  
179 A peaks in Contig 37 and three broken ones (in Contigs 9, 10, 57) lacked sufficient long-read  
180 coverage. We focused on the 10 verified CENP-A regions for the further studies (Table 1).  
181 RNAseq analysis indicated that all of the 10 CENP-A regions exhibited low transcription, except  
182 the region in Contig 11. Contig 11 contained two adjacent ChIP-seq peaks, one was 19 kb and  
183 the other was 114 kb, which were interrupted by a 21 kb transcriptionally active region (Fig. 4C).



184 Here, we define it as one centromere (*CEN4*). Among the 10 CENP-A regions, five have a length  
185 of ~190 kb, and three are ~160 kb, while *CEN3* and *CEN6* are significant larger (>270 kb) (Table  
186 1). All of these centromeres have a GC content comparable to the whole genome (52.16 - 58.13%  
187 vs. 54.6%) (Table 1). Taken together, our CENP-A ChIP-seq analysis utilizing the newly  
188 assembled genome indicates that *P. sojae* CENP-A prefers to bind large poorly transcribed  
189 genomic regions with no specific DNA sequence bias.

190 To examine the correlation between the centromere regions identified in the new genome  
191 assembly and in the Sanger assembly, we conducted synteny analysis using the genomic regions  
192 flanking the centromeres. The locations of CENP-A found in the Psojae2019.1 assembly were  
193 highly correlated with those in the Sanger assembly, except *CEN10* (Table 1, Figs. 3 and S6).  
194 Contig 51 was colinear with the Sanger scaffold 23; however, no enriched CENP-A signal was  
195 detected for this scaffold, probably because the region corresponding to *CEN10* is interrupted by  
196 gaps. Notably, the two CENP-A binding regions in Sanger Scaffold 1 were found to correspond  
197 to *CEN8* and *CEN9*, and the smaller one was expanded from 20 kb to 188 kb corresponding to  
198 *CEN8* (Table 1, Figs. S4B and S6H). In addition, four contigs of the Psojae2019.1 assembly  
199 (contigs 4, 38, 23, and 58) are collinear with Sanger Scaffold 1, and telomere repeats are found  
200 at the ends of Contigs 4 and Contig 58, further suggesting that Scaffold 1 of the Sanger genome  
201 is assembled incorrectly and should be split into two scaffolds (Fig. S6H). Overall, comparison of  
202 centromeres identified in the Sanger and Psojae2019.1 assemblies further confirms their  
203 authenticity and reflects some misassemblies that are present in the Sanger genome assembly.

204

### 205 ***P. sojae* CENP-A regions are embedded within heterochromatin**

206 To define the epigenetic state of *P. sojae* centromeric regions, we performed ChIP-seq  
207 with antibodies against two heterochromatin marks (H3K9me3, trimethylation of lysine 9 of  
208 histone H3, and H3K27me3, trimethylation of lysine 27 of histone H3) and one euchromatin mark

209 (H3K4me2, dimethylation of lysine 4 of histone H3). The distribution of H3K9me3 and H3K27me3  
210 is generally coincident throughout the genome, and both were colocalized with the CENP-A  
211 binding regions (Figs. 4 and S7). Intriguingly, the heterochromatic region extended 8kb to 64 kb  
212 beyond each CENP-A binding region (Fig. 4A and Table 1), similar to pericentromeric  
213 heterochromatin regions described in other species (13, 21, 39). In contrast, the euchromatic  
214 mark H3K4me2 was excluded from the CENP-A region and its flanking pericentric regions, and  
215 generally overlapped with the mRNA transcriptional profile (Figs. 4 B-C and S7). Thus, distribution  
216 of histone modifications suggests that the CENP-A and heterochromatin regions are not spatially  
217 distinct, and we define the latter as pericentric regions.

218

### 219 **A Copia-like transposon (CoLT) is highly enriched in the *P. sojae* centromeres**

220 The Psojae2019.1 genome assembly contains 31% repetitive sequences, the majority of  
221 which are transposable elements (TEs) (Fig. S5D). Our analysis showed that centromeres are  
222 also composed of many repetitive elements, mostly LTR-retrotransposons (Figs. 3 and S6). To  
223 identify whether the centromeres in *P. sojae* possess any common sequences or repeat elements,  
224 all identified CENP-A regions were subject to multiple sequence alignment. This analysis found  
225 an ~5 kb sequence that is highly similar (>98%) and shared among 10 centromeres (Fig. S8 and  
226 Dataset S3). BLAST analyses with the consensus 5 kb sequence against the genome revealed  
227 that although this element is not exclusive to centromeres, it is significantly enriched in  
228 centromeres: approximately 90% of all genomic copies of this element localized to centromeres  
229 (Fig. 5A). Moreover, this element is present as clusters in centromeric regions, and only sparsely  
230 found in other regions of the genome, further strengthening its association with centromeres.  
231 Further examination of the sequence indicates that it resembles a Copia transposon-like  
232 transposon, and we named it CoLT for Copia Like Transposon (Fig. 5B, Dataset S3).

233

234 **CoLT clusters are conserved in two *P. sojae* oomycete relatives and may be a hallmark of**  
235 **oomycete centromeres**

236 To examine if clustered CoLT elements found in *P. sojae* centromeres are also present in  
237 other oomycete genomes, we conducted BLAST searches using the 5 kb consensus sequence  
238 derived from *P. sojae* centromeres against the genome assemblies of two *P. sojae* relatives,  
239 *Bremia lactucae* (downy mildew, lettuce pathogen) and *Phytophthora citricola* (citrus pathogen),  
240 which have relatively contiguous genome assemblies. Interestingly, similar CoLTs clusters were  
241 observed in these genomes, and usually appeared once per contig (Figs. 5C and S9A). To assess  
242 if these clustered CoLTs were syntenic with the *P. sojae* centromere-containing contigs, we  
243 examined the CoLT clusters that were present within Mb-long scaffolds/contigs. Synteny analysis  
244 demonstrated that five regions in the *B. lactucae* genome that had CoLT clusters were collinear  
245 with *P. sojae* centromeres (Figs. 5C and D). Unexpectedly, Scaffold 2 (original name,  
246 SHOA01000004.1, see Dataset S4 for details) contained two CoLT clusters that were syntenic  
247 with *P. sojae* *CEN3* and *CEN5* (Fig. 5D), indicating that scaffold 2 may be incorrectly assembled  
248 (Fig. 5D). It should be noted that the *B. lactucae* genome assembly still has a large percentage  
249 of unresolved gaps likely due to its highly heterozygous nature (36). In comparison, all three  
250 selected regions that had clustered CoLT clusters within *P. citricola* contigs (PcContigs) were  
251 syntenic with *P. sojae* centromeres (*CEN3*/PcContig2, *CEN9*/PcContig1, *CEN5*/PcContig26)  
252 (Figs. S9 B-D). However, a large number of the CoLT clusters localized at contig ends, or were  
253 distributed across the length of short contigs (Fig. S9A). This suggests that many of the  
254 centromeric regions in *P. citricola* were not fully assembled. Taken together, we propose that the  
255 clustered CoLT elements may be used as criteria to predict centromere regions in other  
256 *Phytophthora* species and possibly in other oomycetes.

## 257 Discussion

258 In this study, we identified centromeres in the oomycete plant pathogen *P. sojae* by  
259 combining long-read sequencing and ChIP-seq with the GFP tagged kinetochore protein CENP-  
260 A. Cellular dynamics analysis revealed that *P. sojae* centromeres were clustered within nuclei in  
261 different life stages and during vegetative growth. 10 fully assembled and five incompletely  
262 assembled CENP-A binding regions were identified. The common features shared by these  
263 regions include: a) a low level of transcription; b) a GC content similar to that of the whole genome;  
264 c) repetitive sequences; d) enrichment for a specific Copia-like transposon; e) overlapping and  
265 surrounding heterochromatin; and f) lack of H3K4me2.

266 While CENP-A is conserved among different organisms, centromere sequences evolve  
267 rapidly (1, 40). Although the filamentous fungal-like oomycetes are classified in the stramenopiles  
268 of the SAR supergroup, it is intriguing to observe that the centromeres that we identified in *P.*  
269 *sojae* are much larger and more complex, comparing to those reported in its stramenopile relative,  
270 the diatom *P. tricornutum*, and those found in the parasites (*P. falciparum* and *T. gondii*) of the  
271 alveolates (Fig. 6). In the latter three cases, all centromeres are composed of non-repetitive  
272 sequences. Surprisingly, *P. sojae* centromeres show structural similarity to several, only distantly  
273 related, fungal species, such as *N. crassa* (13) and *Cryptococcus neoformans* (12). These  
274 features include an enrichment of transposons (or their remnants), and overlap with the  
275 constitutive heterochromatin mark H3K9me2/3. Remarkably, the euchromatin mark H3K4me2  
276 has been shown to be associated with centromeres in humans, mouse, *Drosophila*, *S. pombe*,  
277 and rice (39, 41-43), but is excluded from other fungal regional centromeres reported to date and  
278 in *P. sojae*. In humans and *D. melanogaster*, the CENP-A and pericentromeric heterochromatin  
279 domains are spatially distinct, and the CENP-A domain is flanked by but does not overlap with  
280 heterochromatin (39, 43, 44). In contrast, the entire centromere of *P. sojae* is embedded in  
281 heterochromatin. It is unknown if the distribution of heterochromatin regions affects centromere

282 distribution in *P. sojae*, but heterochromatin has been shown to be important for centromere  
283 function and kinetochore assembly in *N. crassa* and *S. pombe* (13, 45, 46). In addition, it is of  
284 interest that *P. sojae* H3K9me3 and H3K27me3 fully overlap with the centromeric regions, which  
285 have not been observed in centromeres of other species thus far, but was shown in human and  
286 mouse pericentromeres (8, 47). On the other hand, these two epigenetic marks generally coexist  
287 throughout the entire genome, suggesting it might be just a general profile of H3K27me3 and  
288 H3K9me3 in *P. sojae*.

289 Transposable elements (and their relics) have been known as residents of the  
290 centromeres and pericentromeres of many animals, plants, and fungi (48). While animal  
291 centromeres are associated with both satellite DNA and retroelements, satellite DNA is usually  
292 regarded as the main sequence components (49). Centromeres of many plants, such as maize  
293 and rice, are built on centromere-specific retrotransposons (CR), and a certain CR is usually  
294 unique to a particular chromosome (7). Centromeres of *N. crassa* (13) and *C. neoformans* (12)  
295 are composed of retrotransposons, and the retroelements in *C. neoformans* are centromere-  
296 specific (12). In comparison, although *P. sojae* regional centromeres include various transposons,  
297 many of these elements are not limited to this region and can also be found in other genomic  
298 areas. Our study shows that a specific Copia-like transposon (CoLT) is highly enriched in the *P.*  
299 *sojae* centromeric regions and confines the CENP-A binding regions (Figs. 4 B-C and S7). A  
300 similar distribution pattern of centromere-associated retrotransposons was recently found in  
301 *Drosophila melanogaster* (21). In *D. melanogaster*, a non-LTR retroelement named *G2/Jocky-3*  
302 was found to be enriched in CENP-A chromatin, and this element is also associated with  
303 centromeres in its sister species *D. simulans* (21). Strikingly, the CoLT elements were found to  
304 be clustered in the genomes of *P. sojae* oomycete relatives, and some of those regions were  
305 syntenic with *P. sojae* centromeric regions. As most of the oomycete genome assemblies were  
306 not based on long-read sequencing technology, and thus are very fragmented, it remains to be

307 seen if the CoLT elements have evolved to be widely utilized by oomycetes as a platform for  
308 CENP-A loading.

309         Due to large genome scales and potentially similar chromosome sizes, the karyotypes of  
310 *Phytophthora* species cannot be well resolved by pulse field gel electrophoresis (31, 50). The  
311 chromosome number of *P. sojae* is not yet accurately known, but has been estimated to be  
312 between 10 and 15 based on an earlier cytological study (51). By comparing the location of  
313 centromeres in the Sanger and Psojae2019.1 assembly, we can validate and predict the  
314 configuration of 11 centromeres, namely *CEN1-CEN10*, and *CEN\_C9 + CEN\_C48* (Table 1 and  
315 Table S4). Three centromeres, namely *CEN\_C37*, *CEN\_C10* and *CEN\_C57*, are not fully  
316 assembled. Thus, our results offer a new estimate 12-14 chromosomes in *P. sojae*.

317         N-ChIP was implemented for this study, because several attempts to perform ChIP  
318 analysis based on traditional formaldehyde-cross-linking strategies were unsuccessful. Cross-  
319 linking with 1% formaldehyde caused degradation of DNA and failure of ChIP. *P. sojae*  
320 transformants expressing GFP tagged CENP-A and CENP-C were both used for N-ChIP-seq.  
321 However, only the GFP-CENP-A transformant produced significant enrichment, indicating that the  
322 binding of CENP-C to chromosomes may be too weak to recover target DNA under native  
323 conditions without cross-linking.

324         Our analysis showed that having an improved reference genome assembly based on long-  
325 read sequencing technologies was crucial to the identification and characterization of  
326 centromeres in *P. sojae*. Our attempt to characterize centromere sequences using the classical  
327 Sanger assembly was not successful because most of the non-coding repetitive regions were not  
328 assembled. While the N50 of the new genome assembly Psojae2019.1 is lower than that of the  
329 Sanger assembly, the contigs do not contain gaps and many of the gaps present in the Sanger  
330 assembly have been closed (Fig. S6). We tried to scaffold the assembly with different scaffolding  
331 programs such as npScarf (52), SSPACE (53), LINKS (54) and the optical BioNano mapping

332 (*Appendix SI Text* and Fig. S10). Although these scaffolders improved the contiguity (up to 35  
333 scaffolds using SSPACE), they also generated multiple conflicts with the Sanger assembly, and  
334 most of the joins could not be supported by evidence such as long read coverage (Fig. S11 and  
335 Table S3). Thus, we opted to retain the contig-level assembly in our study. However, identification  
336 of centromeres helped to resolve several structural problems present in the “classical” *P. sojae*  
337 Sanger assembly, and revealed potential structural problems in other oomycete genome  
338 assemblies. On basis of the presence of centromeres and predicted telomeres together with  
339 synteny analyses, we found that three Sanger scaffolds/contigs may represent full length  
340 chromosomes, namely Scaffold 2/Contigs [26+1+35+6] (Fig. S6A), Scaffold 5/Contigs  
341 [17+36+7+49+45] (Fig. S6G); and partial Scaffold 1/Contigs [58+38+4] (Fig. S6H). Notably,  
342 telomeres appear on the both ends of Sanger Scaffold 5 and its syntenic contigs in Psojae2019  
343 (Fig. S6G). There are five *P. sojae* centromeres that are not fully assembled. With the  
344 development of sequencing and assembly technologies, a finalized chromosome-level genome  
345 assembly could help to assemble those broken centromeres, and refine the centromere  
346 sequences that we identified.

347 Centromeres and their associated kinetochore network serve critical functions in genome  
348 stability and replication. Failures in kinetochore assembly and attachment increase the probability  
349 of chromosome mis-segregation leading to aneuploidy (55). While these drastic genome changes  
350 can be detrimental to the organism, formation of aneuploidy and polyploidy is an important  
351 strategy orchestrated by pathogens to adapt to the environment during periods of stress (56).  
352 Polyploidy and aneuploidy are prevalent in *Phytophthora* natural isolates and progeny from sexual  
353 reproduction (35, 57-60). Interestingly, plant hosts can induce aneuploidy of the sudden oak death  
354 pathogen *P. ramorum*, which enhances its phenotypic diversity and increases its adaption to the  
355 environment (59). Recently, a phenomenon termed dynamic extreme aneuploidy (DEA) was  
356 described in a vegetable oomycete pathogen, *P. capsici*, in which high variability among progeny  
357 produced by asexual spores was caused by ploidy variation (61). However, the mechanisms

358 resulting in oomycete aneuploidy and/or polyploidy is understudied. As centromeres are the  
359 functional and structural foundation for kinetochore assembly and proper chromosome  
360 segregation, identification of centromeres and kinetochore proteins in *P. sojae* may help to  
361 illuminate the mechanisms underlying oomycete genetic, genomic, and phenotypic diversification.



## 362 **Materials and methods**

### 363 ***P. sojae* culture and transformation**

364 All the strains used in this study are listed in Table S5. The reference *P. sojae* isolate  
365 P6497 (race 2) used in this study was routinely grown and maintained in cleared V8 media at  
366 25 °C in the dark. Transient gene expression assays based on an optimized polyethylene glycol  
367 (PEG) mediated protoplast transformation protocol (30) was applied to examine the nuclear  
368 localization of CENP-A. Stable and homokaryotic transformants were chosen for ChIP-seq, which  
369 were generated by passaging on V8 supplemented with 50 µg/mL G418 (Geneticin, AG Scientific,  
370 San Diego, California, USA) for at least 5 times followed by zoospore isolation. Co-transformation  
371 was employed to generate strains expressing both H2B-mCherry and GFP-CENP-A.  
372 Transformation was performed as previously described (30). Sporangia and zoospores were  
373 induced by water flooding according to a method described previously (62).

374

### 375 **Construction of plasmids**

376 All the primers used in this study are listed in Table S6. All GFP fusion constructs were  
377 generated based on the plasmid backbone pYF3-GFP (63), in which StuI was used for the N-  
378 terminal fusions, and HpaI was used for the C-terminal fusions.

379 3'-RACE was conducted to validate the gene model of CENP-A, according to the  
380 manufacturer instruction (Invitrogen, Cat. no. 18373-019). All PCR-amplifications were performed  
381 using Phusion High-Fidelity DNA Polymerase (NEB, M0530S).

382

### 383 **CRISPR-mediated gene replacement**

384 A sgRNA guide sequence whose PAM sequence overlapped with the start codon of  
385 CENP-A was selected as the CRISPR/Cas9 targets. An oligo annealing strategy was used for  
386 assembly of the sgRNA expression cassettes according to previously described methods (30).

387 HDR templates for CENP-A was assembled using NEBuilder® HiFi DNA Assembly. 5'-junction,  
388 3'-junction and spanning diagnostic PCR were performed to genotype mutants, utilizing the  
389 primers listed in Table S6.

390

### 391 **Microscopy imaging of *P. sojae* transformants**

392 A Zeiss 780 inverted confocal microscope was adopted to examine the subcellular  
393 localization of GFP tagged CENP-A driven by strong promoters. Images were captured using a  
394 63 X oil objective with excitation/emission settings (in nm) 488/504-550 for GFP, and 561/605-  
395 650 for mCherry. DeltaVision elite deconvolution microscope (Olympus IX-71 base) equipped with  
396 Coolsnap HQ2 high resolution CCD camera was employed to examine the subcellular localization  
397 of GFP tagged CENP-A produced from the native loci. Images were captured using a 100 X oil  
398 objective (100x/1.40 oil UPLSAPO100X0 1-U2B836 WD 120 micron DIC  $\infty$ /0.17/FN26.5, UIS2)  
399 with an excitation filter, 475/28 and an emission filter, 525/50 for GFP. Time-lapse experiments  
400 were performed with 40 X oil objective (40x/0.65-1.35 oil UAPO40XOI3/340 1-UB768R WD 100  
401 micron DIC  $\infty$ /0.17/FN22, UIS2, BFP1), with the same filters. Confocal images were edited using  
402 microscope's built-in Zen 2012 software (Blue and/or Black edition according to different  
403 purposes). DeltaVision images were edited using Fiji-ImageJ and Photoshop.

404

### 405 **High molecular weight genomic DNA extraction and ONT sequencing**

406 High molecular weight (HMW) genomic DNA (gDNA) from *P. sojae* was isolated by the  
407 CTAB DNA extraction method. 1 g 3-day old fresh *P. sojae* liquid cultures were collected by  
408 filtration and washed twice with sterile water. The resulting damp mycelial pads were frozen  
409 immediately in liquid nitrogen in a pre-cooled mortar, then ground by a pestle. Mycelial powder  
410 was transferred to a 50 ml Falcon tube and mixed gently with 10 ml room temperature *P. sojae*  
411 CTAB extraction buffer (200 mM Tris·HCl pH=8.5, 250 mM NaCl, 25 mM EDTA pH=8.0, 2% SDS,

412 1% CTAB). The suspension was incubated in 65°C for 15 minutes with mixing every 5 minutes.  
413 An equal volume of phenol/chloroform/isoamyl alcohol (25:24:1, saturated with 10 mM Tris,  
414 pH=8.0 and 1 mM EDTA) was added to the suspension and mixed gently by inverting the tube,  
415 then centrifuge at 4°C, 5000 g for 15min. The supernatant was transferred to a new 50 ml tube and  
416 treated with RNase A (final concentration, 100 µg/ml) at 37°C for about 1 hour, followed by  
417 proteinase K treatment (final concentration 200 µg/ml) at 50°C for 2 hours. An equal volume of  
418 chloroform was added to the solution and mixed gently by inverting the tube, then centrifuge, 4°C,  
419 5000 g for 15min. The supernatant was transferred to a new 50 ml Falcon tube and DNA  
420 precipitated by addition of an equal volume of isopropanol. The tube was mixed gently and  
421 incubated on ice for 6 hours. The resulting white clump of DNA was spooled by a pipette tip and  
422 washed once with 70% ethanol. The gDNA was air-dried for 15 minutes at room temperature and  
423 dissolved in 100 µl sterile water. The quantity of DNA was examined by Qubit and the quality was  
424 checked by pulse field gel electrophoresis (PFGE).

425 1D Genomic DNA by Ligation kits (SQK-LSK108, for MinION); SQK-LSK109, for GridION)  
426 were used to prepare the Oxford Nanopore library. Oxford Nanopore sequencing runs was  
427 performed on SpotON R9.4 flow cells with MinKNOW V1.11.5 using MinION or SpotON R9.4.1  
428 flow cells with MinKNOW V3.1.20 using GridION. All of the GridION sequence were basecalled  
429 (on GridION, in real time) using Guppy v2.0.5.

430

### 431 **Native ChIP-seq**

432 Native ChIP was performed according to the ChIP protocol accompanying Gent, Wang  
433 and Dawe (64) with modifications. Briefly, 1-3 mg mycelia were collected from 1-1.5 L of ~3-day  
434 culture by filtration system, and ground into fine powder in liquid nitrogen with pre-chilled mortars  
435 and pestles. Nuclei were isolated and digested by micrococcal nuclease (M0247S, NEB) at 37 for  
436 6 min. An antibody against GFP (Abcam, ab290) was used to immunoprecipitate single

437 nucleosomes containing the GFP-CENP-A fusion (driven by the strong promoter derived from  
438 *HAM34* gene). Antibodies H3K9me3 (Abcam, ab8898), H3K27me3 (Active Motif, 39157), and  
439 H3K4me2 (Millipore, 07-030) were used to immunoprecipitate nucleosomes with relevant  
440 modifications. ChIP-seq of GFP-CENP-A and H3K27me3 were performed by Genewiz using  
441 Illumina NextSeq500 that generated 150 nucleotide paired-end reads; ChIP-seq of H3K9me3 and  
442 H3K4me2 were conducted by BGI using Illumina Hiseq 4000 that produced 50 nucleotide single-  
443 end reads. Numbers of reads for each sample are listed in Table S2.

444

#### 445 **Analysis of ChIP-seq and RNA-seq**

446 To map ChIP-seq reads to the genomes, the quality of raw ChIP-seq reads were first  
447 assessed by FastQC (v0.11.6). For ChIP-seq of CENP-A, H3K27me3, the resulting reads were  
448 trimmed with fastx-clipper and mapped with Bowtie2 with default parameters (65) and aligned to  
449 the genome assemblies. For H3K9me3 and H3K4me2, the ChIP-seq reads were polished by BGI  
450 prior to be released and thus mapped to the genomes directly using the same Bowtie2 setup. The  
451 aligned file (.bam) was sorted and indexed by samtools (version 1.9). Subsequently the ChIP-ed  
452 and input samples were analyzed with DeepTools(v3.2.0) “bamCompare” to calculate normalized  
453 ChIP signal ( $\log_2[\text{ChIP}_{\text{RPKM}}/\text{Input}_{\text{RPKM}}]$ ) and bigwig files were generated. Then .bw files were  
454 visualized using the Integrative Genome Viewer (IGV). (<https://software>.

455 [broadinstitute.org/software/igv/](https://software/broadinstitute.org/software/igv/)). To get profile mRNA, the existing RNA-Seq reads (FungiDB,

456 <https://fungidb.org/fungidb/>) were aligned to the genomes using HISAT2 (version 2.1.0), and the

457 resulting files (.bam) were sorted and indexed by samtools (version 1.9). The .bam file was

458 converted to .tdf for visualization using IGV.

459

460

461

## 462 **Genome assembly, analysis of genomic features and synteny comparison**

463 Details of the *de novo* genome assembly is described in SI Text. To predict gene models,  
464 first, the assembly Psojae2019.1 was subjected to repeat masking utilizing RepeatMasker (66)  
465 based on a library of *de novo*-identified repeat consensus sequences that was generated by  
466 RepeatModeler ([www.repeatmasker.org/RepeatModeler.html](http://www.repeatmasker.org/RepeatModeler.html)). Next, the repeat-masked  
467 assembly was used to predict gene models *ab initio* based on MAKER (v2.31.18) (67) with  
468 predicted proteins from available *P. sojae* and *P. infestans* genome annotations as input (25, 68).  
469 GC content was calculated in non-overlapping 5-kb windows using a modified Perl script  
470 (gcSkew.pl, <https://github.com/Geo-omics/scripts/blob/master/AssemblyTools/gcSkew.pl>) and  
471 plotted as the deviation from the genome average for each contig. Genes encoding ribosomal  
472 RNA (18S, 5.8S, 25S, and 5S) and tRNA were inferred and annotated based on RNAmmer (v1.2)  
473 (69) and tRNAscan-SE (v2.0) (70), respectively. To find telomeres, a custom-made Perl script  
474 was used to search for the sequence "TTTAGGG" that was proposed for oomycetes telomeric  
475 sequences (38). Pairwise synteny comparison between the two *P. sojae* genome assemblies (i.e.  
476 *P. sojae* V3 and Psojae2019.1) or between different oomycete species was conducted using  
477 BLASTn. BLASTn hits and other genomic features were plotted using Circos (v0.69-6) (71).  
478 Whole-genome alignment was computed with MashMap (<https://github.com/marbl/MashMap>)  
479 employing default settings, and was visualized as a dot plot (72).

480

## 481 **Bionano mapping**

482 *P. sojae* protoplasts were generated from 2.5-day old mycelial and were embedded into  
483 agarose. Bionano Prep Cell Culture DNA Isolation Protocol was employed for extracting the high  
484 molecular weight DNA. DNA labelling with DLE-1 was performed according to the standard  
485 protocols provided by Bionano Genomics (Document number 30206, version F). Labelled DNA  
486 samples were loaded into two flow cells and run on a Saphyr system (Bionano Genomics). The  
487 *de novo* assembly was performed using Bionano Solve 3.3. Standard parameters for Saphyr data

488 were used without “extend and split” and without haplotype refinement in order to create a single  
489 map for each allele (“optArguments\_nonhaplotype\_noES\_DLE1\_saphyr.xml”). In the process of  
490 *de novo* assembly, data generated from two flow cells were merged. An assembly graph was  
491 generated during a pairwise comparison of all of the molecules with a p value threshold of 1e-11,  
492 and was refined based on molecules aligned to the assembled maps with a p value threshold of  
493 1e-12. After five rounds of extension and refinement, a final refinement was conducted with a p  
494 value threshold of 1e-16. Then, the *de novo* assembled map was used to scaffold the sequence  
495 assembly. When using the hybrid scaffold module of Bionano Solve 3.3 pipeline, the option of  
496 “resolve conflicts” for sequence contigs and Bionano maps was selected. The standard hybrid  
497 scaffold settings with a modified parameter (-E 0) was applied to remove discrepancies between  
498 sequence assembly and Bionano *de novo* assembly. Sequence contigs were *in silico* digested,  
499 based on the recognition sequence (CTTAAG) of DLE-1. Conflicts detection was accomplished  
500 by aligning contig maps to Bionano maps with p value threshold of 1e-10. When divergence was  
501 identified, the conflicts were resolved by cutting either the contig or the map, depending on the  
502 quality of the genome map at the divergent position.

503

#### 504 **Analysis of transposable elements and identification of CoLT**

505 To identify transposable elements in *P. sojae*, the new genome assembly was subjected to  
506 RepeatMasker (Rebase v23.09) analysis and hits were mapped to this genome assembly. The  
507 Copia-like transposon (CoLT) element was identified in a stepwise way by multiple sequence  
508 alignments followed by extraction of a consensus sequence and BLASTn analyses. Specifically,  
509 an approximately 5 kb consensus sequence was identified in the alignment of centromere  
510 sequences (including incompletely assembled ones) utilizing the multiple alignment program  
511 MAFFT, a plug-in in the Geneious R9 software (<http://www.geneious.com>), with default  
512 parameters. Then the consensus sequence was used as a query to perform a BLASTn search  
513 against the Psojae2019.1 genome assembly. The resulting sequence hits were used to map

514 against the genome, and hits longer than 500 bp were used for representing in the figures. The  
515 longest sequence hit with highest identity was retrieved, and was used as a query to execute a  
516 second round of BLASTn search against the NCBI database to further characterize the  
517 sequence. The results of BLASTn analysis indicated that that the sequence was highly similar to  
518 a Copia-like transposable element. To define the domains of the CoLT, this sequence was  
519 further analyzed by repeat identification (utilizing a bioinformatics software Unipro UGENE(73)),  
520 and by searches utilizing the Repbase database (<https://www.girinst.org/>) and NCBI CD-search  
521 (<https://www.ncbi.nlm.nih.gov/Structure/cdd/wrpsb.cgi>). Sequences of the 5 kb consensus and  
522 the top hit in the Psojae2019.1 genome assembly are shown in Dataset S3.

523

#### 524 **Prediction of centromeric regions in *P. sojiae* closely related species**

525 To predict centromeres of the two oomycete species, namely *Phytophthora citricola*  
526 P0716, (Genbank: GCA\_007655245.1, with permission of the author) and *Bremia lactucae* SF5,  
527 (GenBank: GCA\_004359215.1) (36), BLASTn searches were conducted utilizing the *P. sojiae*  
528 Copia-like transposon (CoLT) as a query. Significant hits (>90% identity and > 500 bp) were  
529 retrieved, and were plotted to all scaffolds of the *B. lactucae* assembly and to contigs > 10 kb of  
530 the *P. citricola* assembly. For CoLT clusters that were localized within scaffolds or contigs, their  
531 collinearities with the Psojae2019.1 assembly were further examined with BLASTn, and  
532 visualized by Circos.

533

#### 534 **Data availability**

535 All raw data of ChIP-seq and Nanopore sequencing and related processed files are  
536 available in the NCBI under the BioProject PRJNA563922.

537

538 **Acknowledgments**

539           We thank BioNano Genomics Support, in particular, Yuanyuan Chang for technical  
540 support of BioNano mapping, Beth Sullivan at Duke University for critical reading and comments  
541 on the manuscript, and members of the Heitman, Sanyal and Garre labs for helpful discussions.  
542 M.N. would like to thank Ulrich Kück and Christopher Grefen for support by the Department of  
543 General and Molecular Botany/Molecular and Cellular Botany of Ruhr University. B.M.T. and B.K.  
544 were supported by Oregon State University. These studies were supported by NIH/NIAID grants  
545 R01 AI050113-15 and R37 MERIT award AI039115-21 to J.H and by the German Research  
546 Foundation (DFG, grant NO407/7-1 to MN). J.H. is also a co-director and fellow of the CIFAR  
547 program, Fungal Kingdom: Threats & Opportunities.



## 548 References

- 549 1. L. E. Kursel, H. S. Malik, Centromeres. *Curr Biol* **26**, R487-R490 (2016).
- 550 2. K. M. Stimpson, B. A. Sullivan, Epigenomics of centromere assembly and function. *Curr Opin Cell*  
551 *Biol* **22**, 772-780 (2010).
- 552 3. A. Buscaino, R. Allshire, A. Pidoux, Building centromeres: home sweet home or a nomadic  
553 existence? *Curr Opin Genet Dev* **20**, 118-126 (2010).
- 554 4. N. Wang, R. K. Dawe, Centromere size and its relationship to haploid formation in plants. *Mol*  
555 *Plant* **11**, 398-406 (2018).
- 556 5. B. E. Black *et al.*, Structural determinants for generating centromeric chromatin. *Nature* **430**,  
557 578-582 (2004).
- 558 6. A. Guse, C. W. Carroll, B. Moree, C. J. Fuller, A. F. Straight, In vitro centromere and kinetochore  
559 assembly on defined chromatin templates. *Nature* **477**, 354-358 (2011).
- 560 7. L. Comai, S. Maheshwari, M. P. A. Marimuthu, Plant centromeres. *Curr Opin Plant Biol* **36**, 158-  
561 167 (2017).
- 562 8. S. M. McNulty, B. A. Sullivan, Alpha satellite DNA biology: finding function in the recesses of the  
563 genome. *Chromosome Res* **26**, 115-138 (2018).
- 564 9. W. Jin *et al.*, Maize centromeres: organization and functional adaptation in the genetic  
565 background of oat. *Plant Cell* **16**, 571-581 (2004).
- 566 10. K. M. Smith, J. M. Galazka, P. A. Phatale, L. R. Connolly, M. Freitag, Centromeres of filamentous  
567 fungi. *Chromosome Res* **20**, 635-656 (2012).
- 568 11. V. Yadav, L. Sreekumar, K. Guin, K. Sanyal, Five pillars of centromeric chromatin in fungal  
569 pathogens. *PLoS Pathog* **14**, e1007150 (2018).
- 570 12. V. Yadav *et al.*, RNAi is a critical determinant of centromere evolution in closely related fungi.  
571 *Proc Natl Acad Sci U S A* **115**, 3108-3113 (2018).
- 572 13. K. M. Smith, P. A. Phatale, C. M. Sullivan, K. R. Pomraning, M. Freitag, Heterochromatin is  
573 required for normal distribution of *Neurospora crassa* CenH3. *Mol Cell Biol* **31**, 2528-2542  
574 (2011).
- 575 14. K. Schotanus *et al.*, Histone modifications rather than the novel regional centromeres of  
576 *Zymoseptoria tritici* distinguish core and accessory chromosomes. *Epigenetics & Chromatin* **8**, 41  
577 (2015).
- 578 15. K. Sanyal, M. Baum, J. Carbon, Centromeric DNA sequences in the pathogenic yeast *Candida*  
579 *albicans* are all different and unique. *Proc Natl Acad Sci U S A* **101**, 11374-11379 (2004).
- 580 16. W. A. Hoeijmakers *et al.*, *Plasmodium falciparum* centromeres display a unique epigenetic  
581 makeup and cluster prior to and during schizogony. *Cell Microbiol* **14**, 1391-1401 (2012).
- 582 17. R. E. Diner *et al.*, Diatom centromeres suggest a mechanism for nuclear DNA acquisition. *Proc*  
583 *Natl Acad Sci U S A* **114**, E6015-E6024 (2017).
- 584 18. C. F. Brooks *et al.*, *Toxoplasma gondii* sequesters centromeres to a specific nuclear region  
585 throughout the cell cycle. *Proc Natl Acad Sci U S A* **108**, 3767-3772 (2011).
- 586 19. V. Yadav *et al.*, Cellular dynamics and genomic identity of centromeres in cereal blast fungus.  
587 *mBio* **10**, e01581-01519 (2019).
- 588 20. M. I. Navarro-Mendoza *et al.*, Early diverging fungus *Mucor circinelloides* lacks centromeric  
589 histone CENP-A and displays a mosaic of point and regional centromeres. *bioRxiv*, 706580  
590 (2019).
- 591 21. P. B. Becker *et al.*, Islands of retroelements are major components of *Drosophila* centromeres.  
592 *PLOS Biology* **17** (2019).

- 593 22. T. Lan *et al.*, Long-read sequencing uncovers the adaptive topography of a carnivorous plant  
594 genome. *Proc Natl Acad Sci U S A* **114**, E4435-E4441 (2017).
- 595 23. M. Jain *et al.*, Linear assembly of a human centromere on the Y chromosome. *Nat Biotechnol* **36**,  
596 321-323 (2018).
- 597 24. P. J. Keeling, F. Burki, Progress towards the Tree of Eukaryotes. *Curr Biol* **29**, R808-R817 (2019).
- 598 25. B. M. Tyler *et al.*, *Phytophthora* genome sequences uncover evolutionary origins and  
599 mechanisms of pathogenesis. *Science* **313**, 1261-1266 (2006).
- 600 26. J. D. Grattapanche *et al.*, Microbial diversity in the eukaryotic SAR clade: Illuminating the  
601 darkness between morphology and molecular data. *Bioessays* **40**, e1700198 (2018).
- 602 27. D. C. Erwin, O. K. Ribeiro, *Phytophthora diseases worldwide* (American Phytopathological Society  
603 (APS Press), 1996).
- 604 28. R. H. Jiang, B. M. Tyler, Mechanisms and evolution of virulence in oomycetes. *Annu Rev*  
605 *Phytopathol* **50**, 295-318 (2012).
- 606 29. S. Savary *et al.*, The global burden of pathogens and pests on major food crops. *Nat Ecol Evol* **3**,  
607 430-439 (2019).
- 608 30. Y. Fang, L. Cui, B. Gu, F. Arredondo, B. M. Tyler, Efficient genome editing in the oomycete  
609 *Phytophthora sojae* using CRISPR/Cas9. *Curr Protoc Microbiol* **44**, 21A-21 (2017).
- 610 31. H. S. Judelson, M. D. Coffey, F. R. Arredondo, B. M. Tyler, Transformation of the oomycete  
611 pathogen *Phytophthora-megasperma* f.sp. *glycinea* occurs by DNA integration into single or  
612 multiple chromosomes. *Current Genetics* **23**, 211-218 (1993).
- 613 32. Y. Fang, B. M. Tyler, Efficient disruption and replacement of an effector gene in the oomycete  
614 *Phytophthora sojae* using CRISPR/Cas9. *Molecular Plant Pathology* **17**, 127-139 (2016).
- 615 33. J. McGowan, D. A. Fitzpatrick, Genomic, network, and phylogenetic analysis of the oomycete  
616 effector arsenal. *mSphere* **2**, e00408-00417 (2017).
- 617 34. B. M. Tyler, M. Gijzen, "The *Phytophthora sojae* genome sequence: foundation for a revolution"  
618 in *Genomics of plant-associated fungi and oomycetes: dicot pathogens*. (Springer, 2014), pp.  
619 133-157.
- 620 35. C. M. Malar *et al.*, Haplotype-phased genome assembly of virulent *Phytophthora ramorum*  
621 isolate ND886 facilitated by long-read sequencing reveals effector polymorphisms and copy  
622 number variation. *Mol Plant Microbe Interact* **32**, 1047-1060 (2019).
- 623 36. K. Fletcher *et al.*, Genomic signatures of heterokaryosis in the oomycete pathogen *Bremia*  
624 *lactucae*. *Nat Commun* **10**, 2645 (2019).
- 625 37. J. J. van Hooff, E. Tromer, L. M. van Wijk, B. Snel, G. J. Kops, Evolutionary dynamics of the  
626 kinetochore network in eukaryotes as revealed by comparative genomics. *EMBO Rep* **18**, 1559-  
627 1571 (2017).
- 628 38. J. Fulneckova *et al.*, A broad phylogenetic survey unveils the diversity and evolution of telomeres  
629 in eukaryotes. *Genome Biol Evol* **5**, 468-483 (2013).
- 630 39. B. A. Sullivan, G. H. Karpen, Centromeric chromatin exhibits a histone modification pattern that  
631 is distinct from both euchromatin and heterochromatin. *Nature Structural & Molecular Biology*  
632 **11**, 1076-1083 (2004).
- 633 40. S. Henikoff, K. Ahmad, H. S. Malik, The centromere paradox: stable inheritance with rapidly  
634 evolving DNA. *Science* **293**, 1098-1102 (2001).
- 635 41. T. A. Volpe *et al.*, Regulation of heterochromatic silencing and histone H3 lysine-9 methylation  
636 by RNAi. *Science* **297**, 1833-1837 (2002).
- 637 42. X. Y. Li *et al.*, High-resolution mapping of epigenetic modifications of the rice genome uncovers  
638 interplay between DNA methylation, histone methylation, and gene expression. *Plant Cell* **20**,  
639 259-276 (2008).

- 640 43. R. C. Allshire, G. H. Karpen, Epigenetic regulation of centromeric chromatin: old dogs, new  
641 tricks? *Nat Rev Genet* **9**, 923-937 (2008).
- 642 44. M. D. Blower, B. A. Sullivan, G. H. Karpen, Conserved organization of centromeric chromatin in  
643 flies and humans. *Dev Cell* **2**, 319-330 (2002).
- 644 45. K. C. Scott, S. L. Merrett, H. F. Willard, A heterochromatin barrier partitions the fission yeast  
645 centromere into discrete chromatin domains. *Curr Biol* **16**, 119-129 (2006).
- 646 46. R. C. Allshire, H. D. Madhani, Ten principles of heterochromatin formation and function. *Nat Rev*  
647 *Mol Cell Biol* **19**, 229-244 (2018).
- 648 47. I. K. Greaves, D. Rangasamy, P. Ridgway, D. J. Tremethick, H2A.Z contributes to the unique 3D  
649 structure of the centromere. *Proc Natl Acad Sci U S A* **104**, 525-530 (2007).
- 650 48. S. Friedman, M. Freitag, "Evolving centromeres and kinetochores" in *Advances in genetics*.  
651 (Elsevier, 2017), vol. 98, pp. 1-41.
- 652 49. J. D. Brown, R. J. O'Neill, The evolution of centromeric DNA sequences. *eLS* (2001).
- 653 50. P. W. Tooley, M. M. Carras, Separation of chromosomes of *Phytophthora* species using CHEF gel  
654 electrophoresis. *Experimental Mycology* **16**, 188-196 (1992).
- 655 51. E. Sansome, C. Brasier, Polyploidy associated with varietal differentiation in the megasperma  
656 complex of *Phytophthora*. *Transactions of the British Mycological Society* **63**, 461-IN411 (1974).
- 657 52. M. D. Cao *et al.*, Scaffolding and completing genome assemblies in real-time with nanopore  
658 sequencing. *Nat Commun* **8**, 14515 (2017).
- 659 53. M. Boetzer, W. Pirovano, SSPACE-LongRead: scaffolding bacterial draft genomes using long read  
660 sequence information. *BMC Bioinformatics* **15**, 211 (2014).
- 661 54. R. L. Warren *et al.*, LINKS: Scalable, alignment-free scaffolding of draft genomes with long reads.  
662 *Gigascience* **4**, 35 (2015).
- 663 55. D. A. Compton, Mechanisms of aneuploidy. *Curr Opin Cell Biol* **23**, 109-113 (2011).
- 664 56. R. T. Todd, A. Forche, A. Selmecki, Ploidy Variation in Fungi: Polyploidy, Aneuploidy, and  
665 Genome Evolution. *Microbiol Spectr* **5**, 599-618 (2017).
- 666 57. M. Elliott *et al.*, Characterization of phenotypic variation and genome aberrations observed  
667 among *Phytophthora ramorum* isolates from diverse hosts. *BMC Genomics* **19**, 320 (2018).
- 668 58. M. P. Dobrowolski, I. C. Tommerup, H. D. Blakeman, P. A. O'Brien, Non-Mendelian inheritance  
669 revealed in a genetic analysis of sexual progeny of *Phytophthora cinnamomi* with microsatellite  
670 markers. *Fungal Genet Biol* **35**, 197-212 (2002).
- 671 59. T. Kasuga *et al.*, Host-induced aneuploidy and phenotypic diversification in the sudden oak  
672 death pathogen *Phytophthora ramorum*. *BMC Genomics* **17**, 385 (2016).
- 673 60. T. van der Lee, A. Testa, A. Robold, J. van 't Klooster, F. Govers, High-density genetic linkage  
674 maps of *Phytophthora infestans* reveal trisomic progeny and chromosomal rearrangements.  
675 *Genetics* **167**, 1643-1661 (2004).
- 676 61. K. Lamour, S. Shrestha, Y. Zhou, X. Liu, J. Hu, Dynamic extreme aneuploidy (DEA) in the  
677 vegetable pathogen *Phytophthora capsici* sheds light on instant evolution and intractability.  
678 *bioRxiv*, 297788 (2018).
- 679 62. L. Lin *et al.*, The MADS-box transcription factor PsMAD1 is involved in zoosporogenesis and  
680 pathogenesis of *Phytophthora sojae*. *Frontiers in Microbiology* **9** (2018).
- 681 63. Y. Fang, H. S. Jang, G. W. Watson, D. P. Wellappili, B. M. Tyler, Distinctive nuclear localization  
682 signals in the oomycete *Phytophthora sojae*. *Front Microbiol* **8**, 10 (2017).
- 683 64. J. I. Gent, N. Wang, R. K. Dawe, Stable centromere positioning in diverse sequence contexts of  
684 complex and satellite centromeres of maize and wild relatives. *Genome Biol* **18**, 121 (2017).
- 685 65. A. R. Quinlan, I. M. Hall, BEDTools: a flexible suite of utilities for comparing genomic features.  
686 *Bioinformatics* **26**, 841-842 (2010).
- 687 66. A. Smit, R. Hubley, P. Green (2015) RepeatMasker Open-4.0. 2013–2015.

- 688 67. B. L. Cantarel *et al.*, MAKER: An easy-to-use annotation pipeline designed for emerging model  
689 organism genomes. *Genome Res.* **18**, 188-196 (2008).
- 690 68. B. J. Haas *et al.*, Genome sequence and analysis of the Irish potato famine pathogen  
691 *Phytophthora infestans*. *Nature* **461**, 393-398 (2009).
- 692 69. K. Lagesen *et al.*, RNAmmer: consistent and rapid annotation of ribosomal RNA genes. *Nucleic  
693 Acids Res* **35**, 3100-3108 (2007).
- 694 70. T. M. Lowe, P. P. Chan, tRNAscan-SE On-line: integrating search and context for analysis of  
695 transfer RNA genes. *Nucleic Acids Res* **44**, W54-57 (2016).
- 696 71. M. Krzywinski *et al.*, Circos: an information aesthetic for comparative genomics. *Genome Res* **19**,  
697 1639-1645 (2009).
- 698 72. C. Jain, S. Koren, A. Dilthey, A. M. Phillippy, S. Aluru, A fast adaptive algorithm for computing  
699 whole-genome homology maps. *Bioinformatics* **34**, i748-i756 (2018).
- 700 73. K. Okonechnikov, O. Golosova, M. Fursov, U. team, Unipro UGENE: a unified bioinformatics  
701 toolkit. *Bioinformatics* **28**, 1166-1167 (2012).
- 702 74. S. Kumar, G. Stecher, M. Suleski, S. B. Hedges, TimeTree: A resource for timelines, timetrees,  
703 and divergence times. *Mol Biol Evol* **34**, 1812-1819 (2017).

704

705

706 **Figures and tables**

707 **Figure 1.** Subcellular localization of CENP-A in *P. sojae* at different life stages and during  
708 vegetative growth. (A) A schematic showing the generation of GFP-fused CENP-A utilizing  
709 CRISPR/Cas9 mediated gene replacement. (B) Subcellular localization of GFP-tagged CENP-A  
710 (expressed from the endogenous locus) in *P. sojae* hyphae, sporangia, and encysted zoospores.  
711 (C) Time-lapse images illustrating localization of GFP tagged CENP-A during hyphal growth.  
712 Dashed squares denote occurrence of nuclear division. Representative images are shown. Scale  
713 bars in all images, 5  $\mu$ m.

714  
715 **Figure 2.** Contigs in the Psojae2019.1 assembly demonstrating CENP-A enrichment based on  
716 CHIP-seq. (A) 10 fully assembled CENP-A binding sites presented contigs. (B) 5 incompletely  
717 assembled CENP-A binding regions. All contigs are drawn to scale and the ruler indicates the  
718 length of the contigs. All CENP-A profiles shown were normalized to input DNA. mRNA profiles  
719 are shown as log-scales. Solid stars indicate the CENP-A enriched regions within contigs; hollow  
720 stars denote broken centromeres at the edge.

721  
722 **Figure 3.** A representative Circos visualization comparing centromere-containing genomic  
723 regions between the Sanger V3 Scaffold 2 and the Psojae2019.1 assembly. The outer tracks  
724 illustrate assembled contigs (in Psojae2019.1) or scaffold (in *P. sojae* V3) and are color coded as  
725 listed in the key on the bottom. Yellow regions on the outer tracks indicate the locations of  
726 centromeres (CENP-A binding regions). Blue and orange lines link regions with collinearity  
727 across >2 kb, with orange lines corresponding to inversion. Grey box-shaded centromere-  
728 containing regions are magnified for detailed visualization.

729

730 **Figure 4.** *P. sojae* centromeres display heterochromatin marks and are enriched for a Copia-like  
731 transposon (CoLT). (A) Schematics showing the *P. sojae* core centromeres (CENP-A binding  
732 regions) and the pericentric regions of various lengths. Dark and light grey bars indicate core  
733 centromeric and pericentric regions. Digits at the center indicate the size of core centromeres;  
734 digits on the left denote the full length of the centromeres (a combination of core centromere and  
735 pericentromeric region). The right pericentric region of *CEN5* and the left pericentric region of  
736 *CEN10* are not fully assembled, and are indicated by dashed bars. Their full lengths labeled with  
737 question marks. (B-C) Two centromeres (*CEN1* and *CEN4*) are shown as representatives to  
738 compare CENP-A localization to the distributions of modified histones and CoLT elements. A 400  
739 kb region harboring the centromeric region is shown for *CEN1* and *CEN4*. Cyan block, a  
740 transcriptionally active region that interrupts *CEN4*. Profiles of CENP-A, H3K9me3, H3K29me3  
741 and H3K4me2 shown were normalized to input. mRNA profiles are shown as log-scales.

742  
743 **Figure 5.** Genomic distribution of CoLT in the *P. sojae* and *B. lactucaae* genomes. (A) Location of  
744 CoLT elements across all *Psojae2019.1* contigs. (B) Diagram of a representative CoLT structure.  
745 CoLT shown here represents the best hit of BLAST using the consensus sequence obtained from  
746 alignment of the centromeres (Dataset S3). CoLT mainly contains two parts annotated (by  
747 Repbase) as Copia-24\_PIT-LTR, and Copia-24\_PIT-I comprising gag, PR (protease), IN  
748 (integrase), RT (reverse transcriptase) and RH (RNase H) domains. Other CoLT elements show  
749 similar structure, except different lengths of LTR and other domains. (C) Location of CoLT  
750 elements across all *B. lactucaae* scaffolds >100 kb. For ease of analysis, scaffolds in *B. lactucaae*  
751 assembly were sorted and re-named based on sizes (large to small). See Dataset S4 for the  
752 original scaffold names. (D) A representative Circos plot comparing *B. lactucaae* Scaffold 2 that  
753 has clustered CoLTs with the corresponding *Psojae2019* contigs. Regions underscored by green  
754 lines indicate both sides of the CoLT clusters were syntenic with the regions surrounding *P. sojae*

755 centromeres. Regions underlined by blue indicate only one side of the CoLT clusters were found  
 756 to be syntenic with *P. sojæ* centromere flanking sequences.

757

758 **Figure 6.** Diversity of centromere features within the SAR supergroup. Simplified schematics (not  
 759 to scale) showing the structure, epigenetic modifications, size and composition of centromeres  
 760 across SAR lineages. \*Epigenetic state was not examined in the diatom centromeric regions;  
 761 however, several AT-rich DNA sequence can be employed for episome maintenance, suggesting  
 762 diatom centromere might not be epigenetically dependent. Histone modification H3K27me2 was  
 763 only tested in *P. sojæ*. The phylogeny was constructed using TimeTree (74). *Homo sapiens*,  
 764 *Arabidopsis thaliana* and *Neurospora crassa* were used as representatives of animals, plants and  
 765 for the phylogeny analysis, and are used as outgroups illustrating the evolutionary status of the  
 766 SAR supergroup.

767

768 **Table 1.** Centromeres identified in the Psojæ2019.1 assembly and their counterparts in the  
 769 Sanger assembly

| Name         | Contig | Psojæ2019.1                                |                   |                                               | Sanger V3 |                             |
|--------------|--------|--------------------------------------------|-------------------|-----------------------------------------------|-----------|-----------------------------|
|              |        | Position of core centromere, kb (size, kb) | GC% of <i>CEN</i> | Position of pericentric region, kb (size, kb) | Scaffold  | Position of <i>CEN</i> (kb) |
| <i>CEN1</i>  | 1      | 415-579 (164)                              | 56.91             | 361-415 (54)<br>579-650 (71)                  | 2         | 7086-7267                   |
| <i>CEN2</i>  | 2      | 4102-4296 (194)                            | 55.51             | 4094-4102 (8)<br>4296-4305 (9)                | 8         | 2374-2420                   |
| <i>CEN3</i>  | 3      | 3138-3412 (274)                            | 54.81             | 3223-3138 (15)<br>3412-3560 (48)              | 9         | 3075-3286                   |
| <i>CEN4*</i> | 11     | 991-1175 (184)                             | 58.13             | 944-991 (47)<br>1175-1205 (30)                | 4         | 995-1246                    |
| <i>CEN5</i>  | 18     | 1556-1709 (153)                            | 57.93             | 1492-1556 (64)<br>1709-? (>22)†               | 3         | 4078-4138                   |
| <i>CEN6</i>  | 34     | 696-880 (184)                              | 57.65             | 643-696 (53)<br>882-904 (22)                  | 6         | 1521-1726                   |
| <i>CEN7</i>  | 36     | 433-708 (275)                              | 52.16             | 376-433 (57)<br>708-732 (24)                  | 5         | 2049-2310                   |
| <i>CEN8</i>  | 38     | 302-490 (188)                              | 57.01             | 288-302 (14)<br>490-515 (25)                  | 1         | 9667-9688                   |
| <i>CEN9</i>  | 41     | 153-342 (189)                              | 57.40             | 101-153 (52)<br>342-358 (16)                  | 1         | 2921-3079                   |
| <i>CEN10</i> | 51     | 36-152 (116)                               | 57.93             | ?-36 (>36)†<br>152-216 (64)                   | -         | -                           |

770

771 \*Contig11 contains a minor (coordinate, 990,422-1,009,603, 19 kb) and a major (coordinate, 1,060,108-1,174,601, 114 kb) peak that  
 772 are separated by a 21 kb transcriptionally active region.

773 †One side of pericentric heterochromatin region is not fully assembled.

774 **Supplemental Information**

775 **SI Text:** Nanopore sequencing and *de novo* assembly of the reference *P. sojae* genome

776 **Figs. S1.** Summary of the presence and absence of putative core kinetochore proteins identified  
777 in *P. sojae*

778 **Fig. S2.** Identification and expression of CENP-A in *P. sojae*.

779 **Fig. S3.** Generation of *P. sojae* strains expressing GFP tagged CENP-A utilizing CRIPSR/Cas9  
780 mediated genome editing.

781 **Fig. S4.** Scaffolds in the Sanger assembly that are suggested to harbor putative centromeres.

782 **Fig. S5.** Pipeline used for *de novo* assembly and metrics of the *P. sojae* genome assembly  
783 Psojae2019.1.

784 **Fig. S6.** Comparison of centromere-containing genomic regions between the Sanger (*P. sojae*  
785 V3) and the Psojae2019.1 assemblies.

786 **Fig. S7.** Summary of features of each intact centromere and read coverage analysis of  
787 centromere.

788 **Fig. S8.** MAFFT-based alignment of CENP-A binding regions reveals a 5 kb sequence that are  
789 highly similar among *P. sojae* centromeres.

790 **Fig. S9.** Genomic distribution of CoLT in the *P. citricola* genome.

791 **Fig. S10.** Representative contigs that are anchored by BioNano mapping and contigs that are  
792 suggested to be joined.

793 **Fig. S11.** Dot plot comparison of scaffolded assemblies against the original Psojae2019.1  
794 assembly and the Sanger assembly.

795 **Table S1.** Metrics of ONT sequencing

796 **Table S2.** Statistics of ChIP-seq samples

797 **Table S3.** Metrics of scaffolded assemblies and their comparison to the Sanger V3 and  
798 Psojae2019.1 assembly.

799 **Table S4.** Five incompletely assembled centromeres in the Psojae2019 assembly and their  
800 corresponding CENP-A regions mapped in the Sanger assembly

801 **Table S5.** *P. sojae* strains used in the study

802 **Table S6.** Primers used in this study.

803 **Movie S1 (separate file).** Time-lapse experiment showing cellular dynamics of CENP-A during  
804 *P. sojae* vegetative growth.

805 **Dataset S1 (separate file).** Sequences of kinetochore orthologs identified in *P. sojae*.

806 **Dataset S2 (separate file).** 13 telomeres predicted in the Psojae2019.1 assembly.

807 **Dataset S3 (separate file).** DNA sequence of the CoLT consensus sequence and the best hit

808 **Dataset S4 (separate file).** Original names of the sorted *B. lactucaae* scaffolds.

809 **Dataset S5 (separate file).** Bionano mapping report.



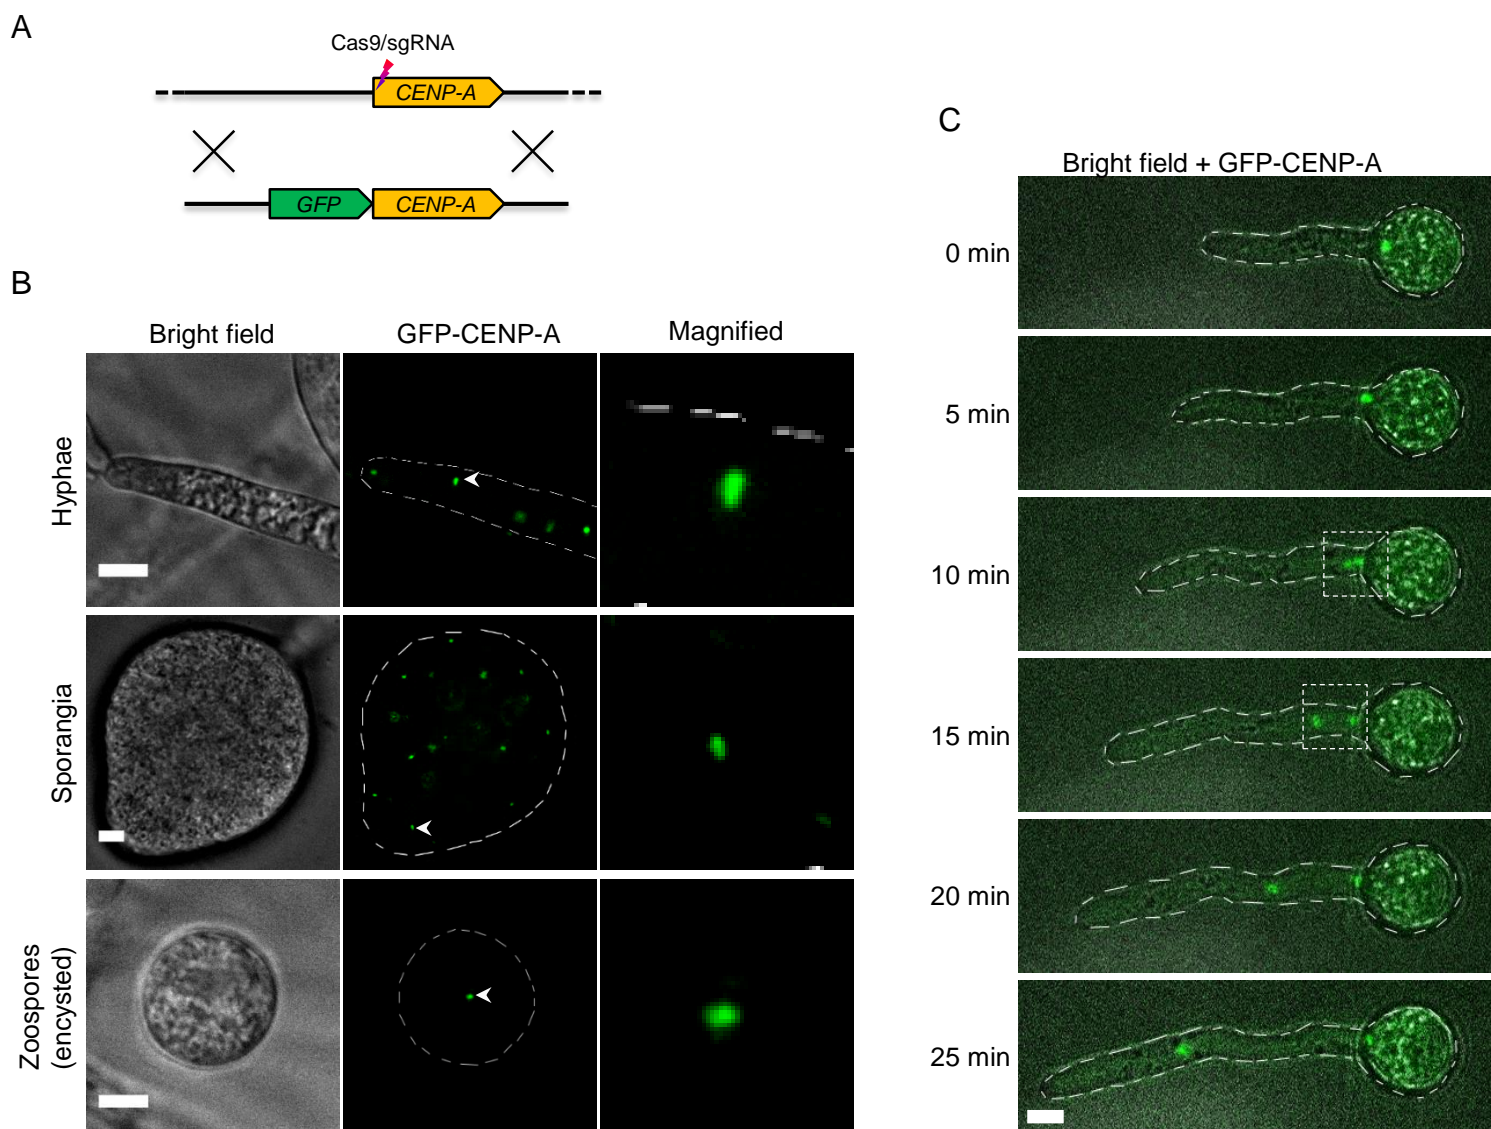

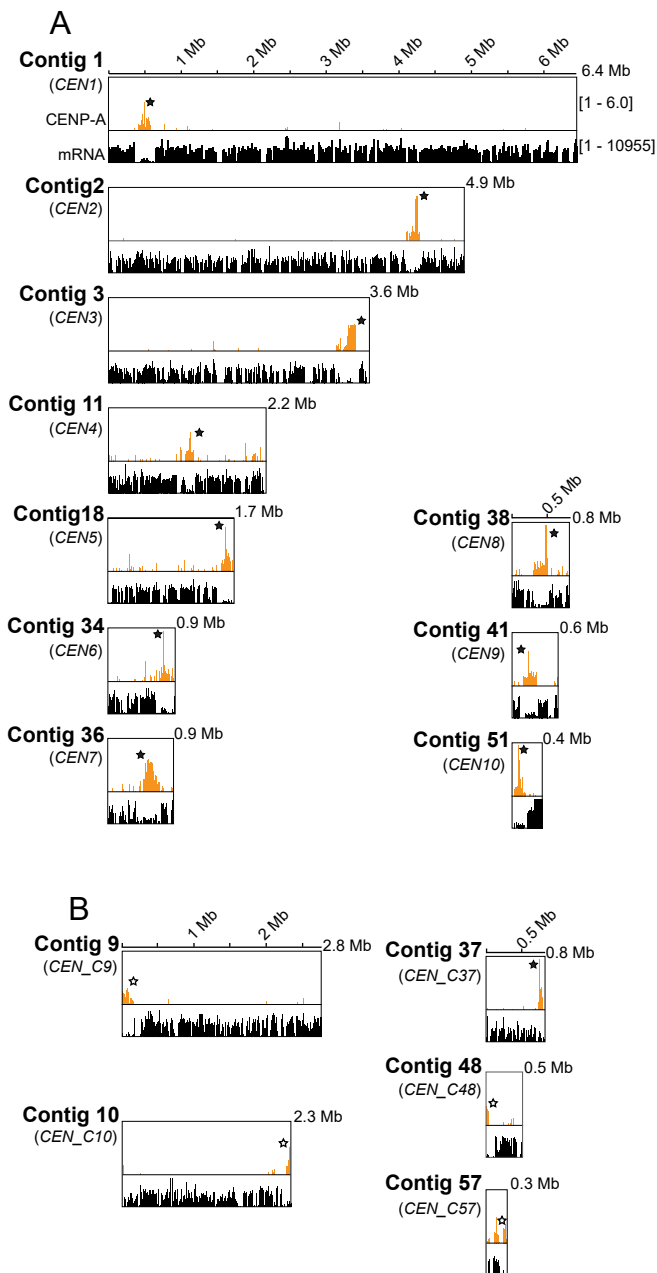

Figure 3

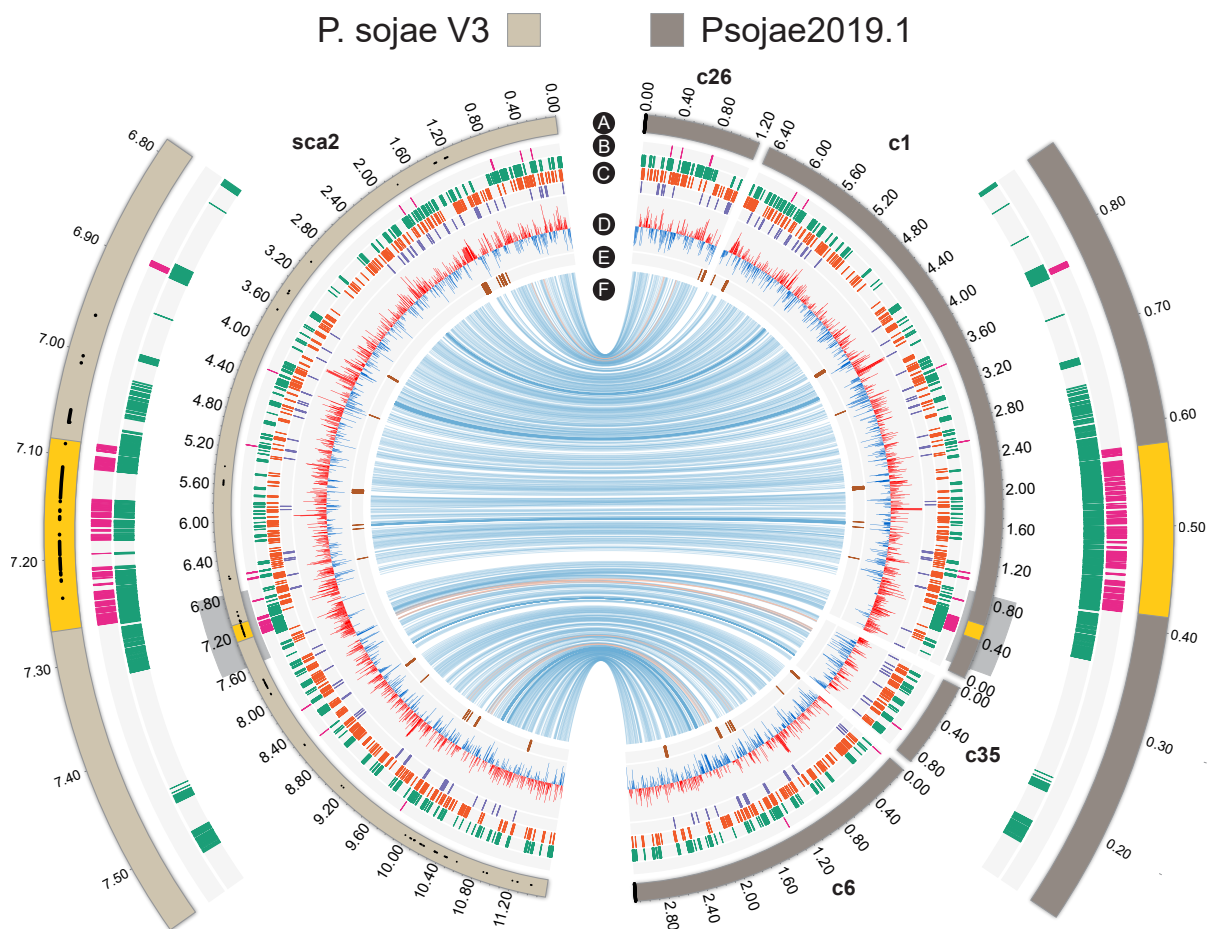

key:

- |                                                                                                                                                                                                                                                                                                                                                                                                                                                                                                                                                                                                                                                                                                                                                                                                                                                                                                                                                                                                                                                                                             |                                                                                                                                                                                                                                                                                                                                                                                                                                                                                                          |
|---------------------------------------------------------------------------------------------------------------------------------------------------------------------------------------------------------------------------------------------------------------------------------------------------------------------------------------------------------------------------------------------------------------------------------------------------------------------------------------------------------------------------------------------------------------------------------------------------------------------------------------------------------------------------------------------------------------------------------------------------------------------------------------------------------------------------------------------------------------------------------------------------------------------------------------------------------------------------------------------------------------------------------------------------------------------------------------------|----------------------------------------------------------------------------------------------------------------------------------------------------------------------------------------------------------------------------------------------------------------------------------------------------------------------------------------------------------------------------------------------------------------------------------------------------------------------------------------------------------|
| <p><b>A</b> contigs:   Telomeric repeats    <span style="background-color: yellow; border: 1px solid black; display: inline-block; width: 10px; height: 10px; vertical-align: middle;"></span> Centromeres    - - - assembly gaps</p> <p><b>B</b> <span style="background-color: magenta; border: 1px solid black; display: inline-block; width: 10px; height: 10px; vertical-align: middle;"></span> Copia-like TE (CoLT) enriched in the centromeres</p> <p><b>C</b> Transposable elements (from the outside inward):<br/> <span style="background-color: green; border: 1px solid black; display: inline-block; width: 10px; height: 10px; vertical-align: middle;"></span> LTR retrotransposons                        <span style="background-color: orange; border: 1px solid black; display: inline-block; width: 10px; height: 10px; vertical-align: middle;"></span> DNA transposons                        <span style="background-color: blue; border: 1px solid black; display: inline-block; width: 10px; height: 10px; vertical-align: middle;"></span> Other transposons</p> | <p><b>D</b> <span style="color: red;">+</span> GC content    red above / blue below genome average (5 kb non-overlapping window)</p> <p><b>E</b> <span style="background-color: orange; border: 1px solid black; display: inline-block; width: 10px; height: 10px; vertical-align: middle;"></span> tRNA genes</p> <p><b>F</b> <span style="border: 1px solid black; border-radius: 50%; width: 10px; height: 10px; display: inline-block; vertical-align: middle;"></span> BLASTn links (&gt; 2 kb)</p> |
|---------------------------------------------------------------------------------------------------------------------------------------------------------------------------------------------------------------------------------------------------------------------------------------------------------------------------------------------------------------------------------------------------------------------------------------------------------------------------------------------------------------------------------------------------------------------------------------------------------------------------------------------------------------------------------------------------------------------------------------------------------------------------------------------------------------------------------------------------------------------------------------------------------------------------------------------------------------------------------------------------------------------------------------------------------------------------------------------|----------------------------------------------------------------------------------------------------------------------------------------------------------------------------------------------------------------------------------------------------------------------------------------------------------------------------------------------------------------------------------------------------------------------------------------------------------------------------------------------------------|

Figure 4

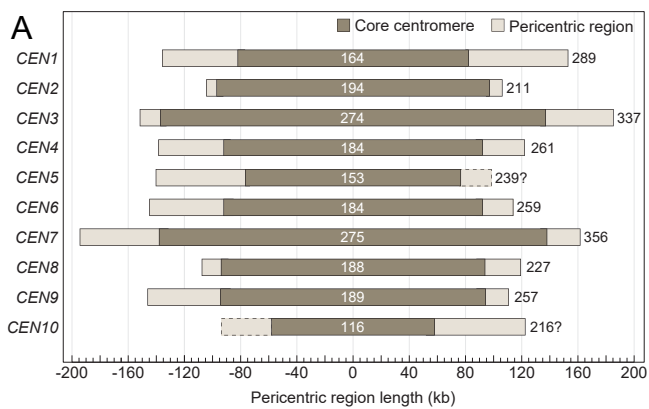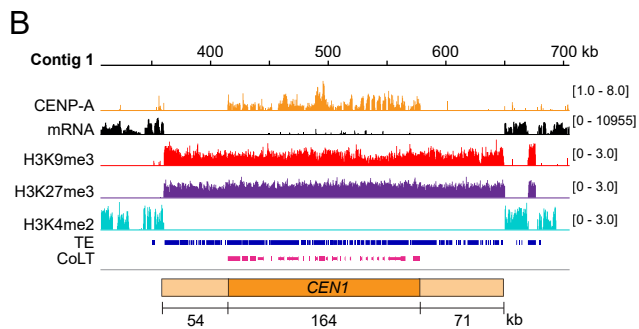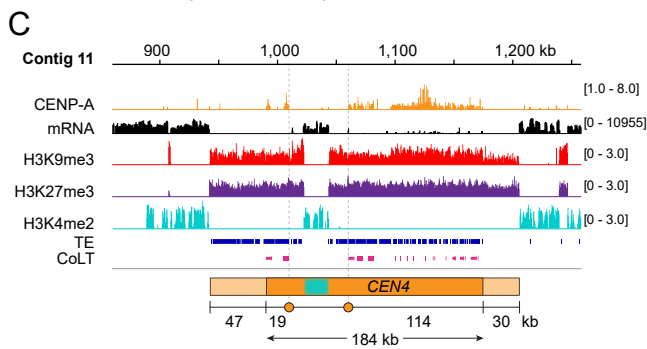

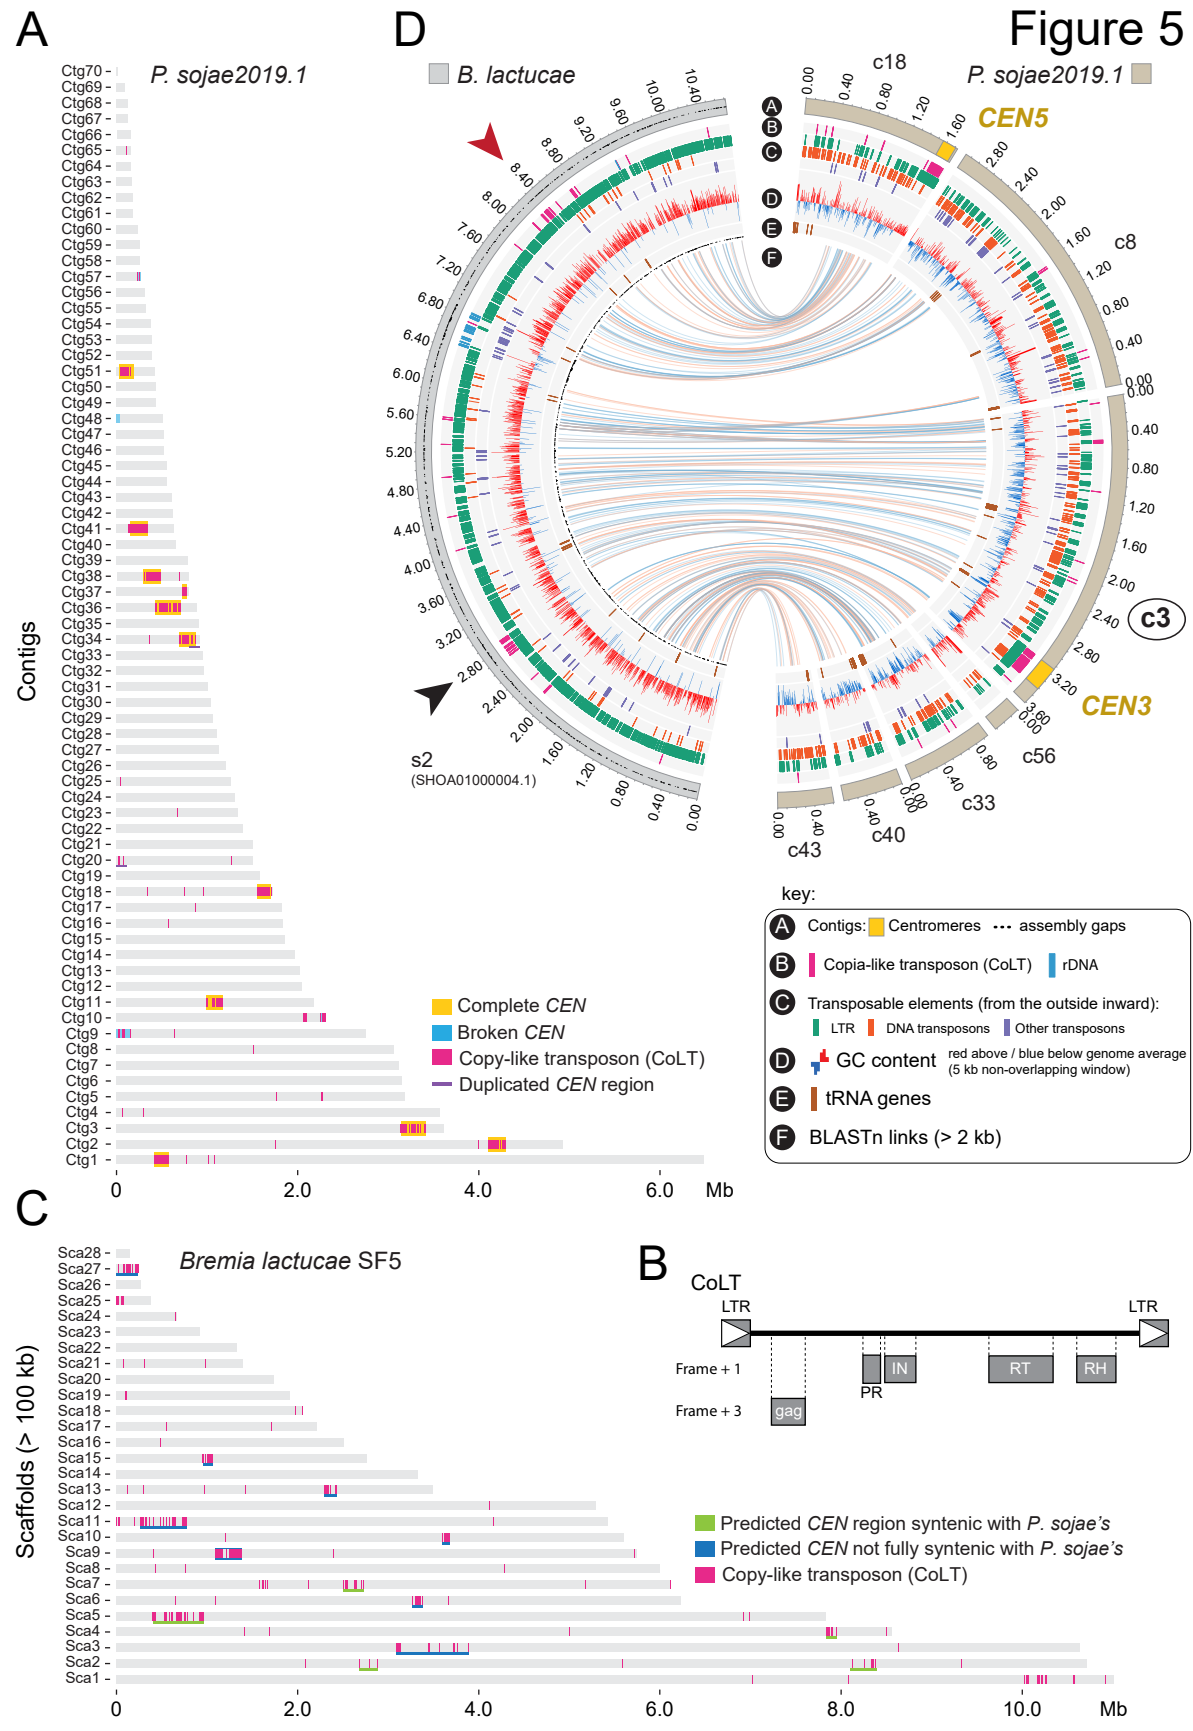

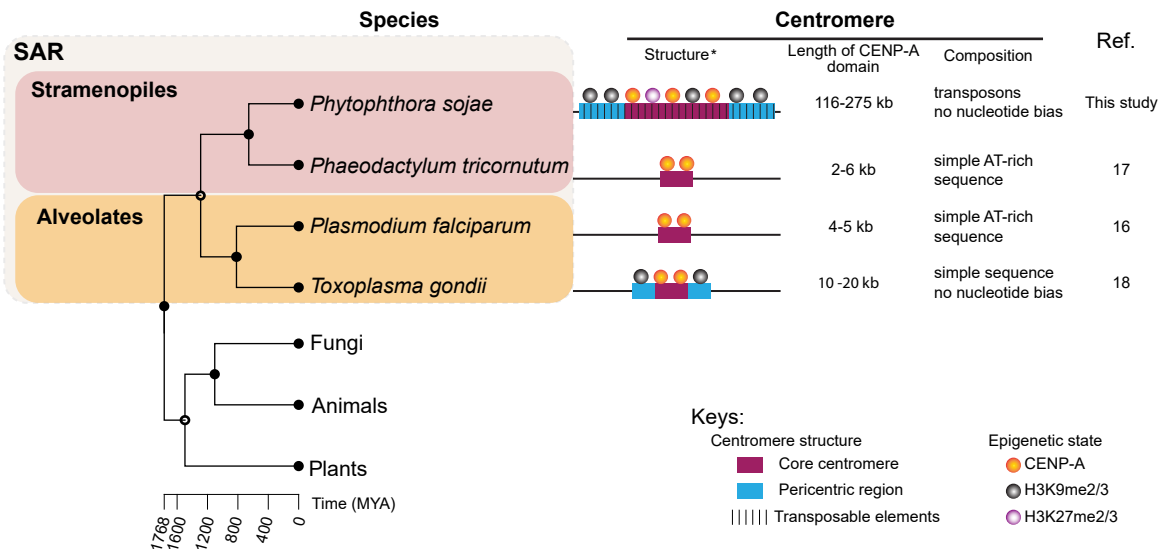

Source: https://www.biorxiv.org/content/10.1101/765032v1.full.pdf
